## Nominations for Distinguished Service Award

**T**he House of Delegates has established policies governing the selection of a recipient for ASA's Distinguished Service Award. Procedures for the submission of nominations and selection of a candidate for 2007 will be as follows:

Any member of ASA or a component society may submit the names of individuals for consideration for this award.

Nominations must be submitted on the nomination forms, which may be obtained from the ASA Executive Office, together with a current curriculum vitae.

Nomination forms should be submitted to:

Eugene P. Sinclair, M.D.  
Committee on Distinguished Service Award  
American Society of Anesthesiologists  
520 N. Northwest Highway  
Park Ridge, IL 60068-2573

Nomination forms must bear a postal mailing date prior to **June 20, 2007**.

The committee will review the names of nominees submitted and recommend to the House of Delegates the name of no more than one candidate. Selection of a candidate shall require a two-thirds vote of the full committee. The Distinguished Service Award may be given to an ASA member for outstanding clinical, educational or scientific achievement or contributions to the specialty and/or exemplary service to the Society.

No officer of ASA shall be eligible for selection.

Should the committee select a candidate to enter into nomination in the House of Delegates, the name of the candidate shall not be disclosed until placed in nomination before the House of Delegates.

Final selection of the recipient of the Distinguished Service Award shall be made by the House of Delegates by secret ballot and shall require a two-thirds vote of those seated in the House of Delegates.

## PBLD 2007 Open Call for Case Submissions

Meg A. Rosenblatt, M.D., Chair  
*Committee on Problem-Based Learning Discussions*

**T**he 2006 Problem-Based Learning Discussion (PBLD) Program consisted of 150 cases that were selected from more than 350 submitted during the open-call process. Each was offered twice during the 2006 Annual Meeting in Chicago, thus allowing attendees more opportunities to be involved in the PBLD program. Attendees responded by filling 96 percent of available seats! The PBLD Committee again wishes to continue the open-call process, which has led to the vibrant nature and ultimate success of the PBLD program.

We are seeking submissions to complete each of the anesthesia tracks that will be offered: ambulatory anes-

thesia, cardiac anesthesia, critical care medicine, neuroanesthesia, obstetric anesthesia, pain medicine, pediatric anesthesia, regional anesthesia, basic science/clinical anesthesia and professional issues. Cases will be reviewed by several members of the committee for relevance, content, scholarship and conformity to the guidelines that appear on the ASA Web site. All cases must be submitted online in the Annual Meeting section of the ASA Web site <[www.ASAhq.org](http://www.ASAhq.org)>.

The deadline for submission is **February 1**.
